# Supplementary material
Source: PubMed Central journal article supplement (PMC553303)
Supplement: pnas_102_10_3639__5.pdf [file pnas_102_10_3639__5.pdf]

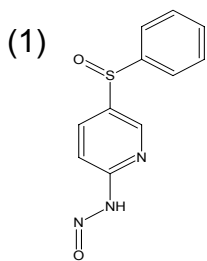

**(1)**  
**N-nitroso-5-(phenylsulfinyl)pyridin-2-amine**

Docking score = -8.35  
Docking Energy = -36.20

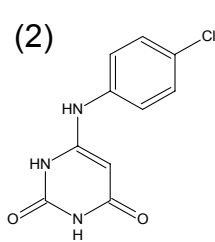

**(2)**  
**6-[(4-chlorophenyl)amino]pyrimidine-2,4(1H,3H)-dione**

Docking score = -7.818  
Docking Energy = -38.38

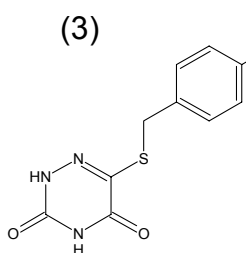

**(3)**  
**6-[(4-chlorobenzyl)thio]-1,2,4-triazine-3,5(2H,4H)-dione**

Docking score = -8.05  
Docking Energy = -38.71

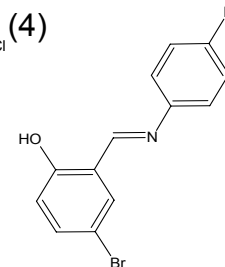

**(4)**  
**4-bromo-2-[(E)-[(4-fluorophenyl)imino]methyl]phenol**

Docking score = -7.975  
Docking Energy = -38.34

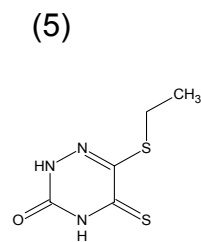

**(5)**  
**6-(ethylthio)-5-thioxo-4,5-dihydro-1,2,4-triazin-3(2H)-one**

Docking score = -7.98  
Docking Energy = -37.20

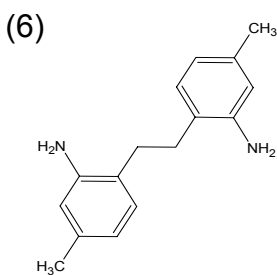

**(6)**  
**2-[2-(2-amino-4-methylphenyl)ethyl]-5-methylaniline**

Docking score = -7.95  
Docking Energy = -36.60

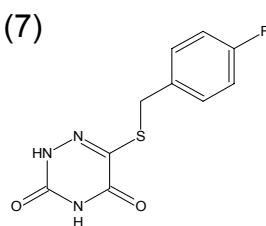

**(7)**  
**6-[(4-fluorobenzyl)thio]-1,2,4-triazine-3,5(2H,4H)-dione**

Docking score = -8.05  
Docking Energy = -38.82

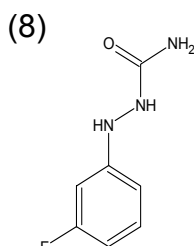

**(8)**  
**2-(3-fluorophenyl)hydrazinecarboxamide**

Docking score = -8.22  
Docking Energy = -35.67

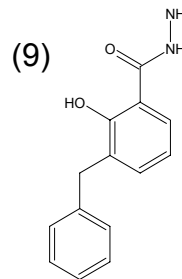

**(9)**  
**3-benzyl-2-hydroxybenzohydrazide**

Docking score = -7.89  
Docking Energy = -37.40

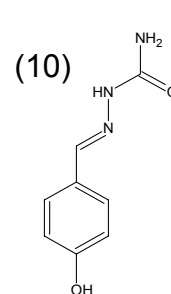

**(10)**  
**4-hydroxybenzaldehyde semicarbazone**

Docking score = -7.55  
Docking Energy = -38.90

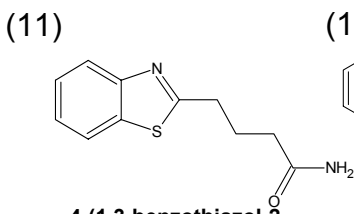

**(11)**  
**4-(1,3-benzothiazol-2-yl)butanamide**

Docking score = -7.12  
Docking Energy = -37.13

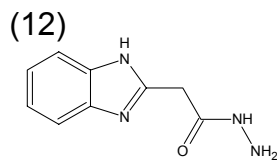

**(12)**  
**2-(1H-benzimidazol-2-yl)acetohydrazide**

Docking score = -7.45  
Docking Energy = -38.01

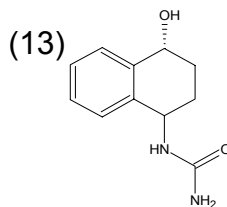

**(13)**  
**N-[(1R,4R)-4-hydroxy-1,2,3,4-tetrahydronaphthalen-1-yl]urea**

Docking score = -7.15  
Docking Energy = -36.92

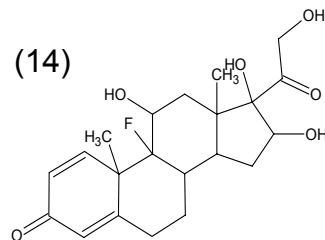

**(14)**  
**Traimcinolone**

Docking score = -8.07  
Docking Energy = -38.78

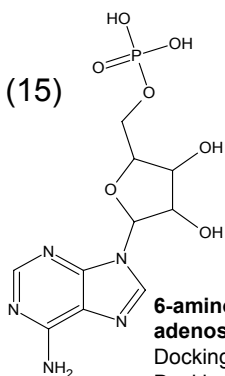

**(15)**  
**6-amino-methyladenosine**

Docking score = -8.78  
Docking Energy = -38.98
