# Supplementary material
Source: PubMed Central journal article supplement (PMC553303)

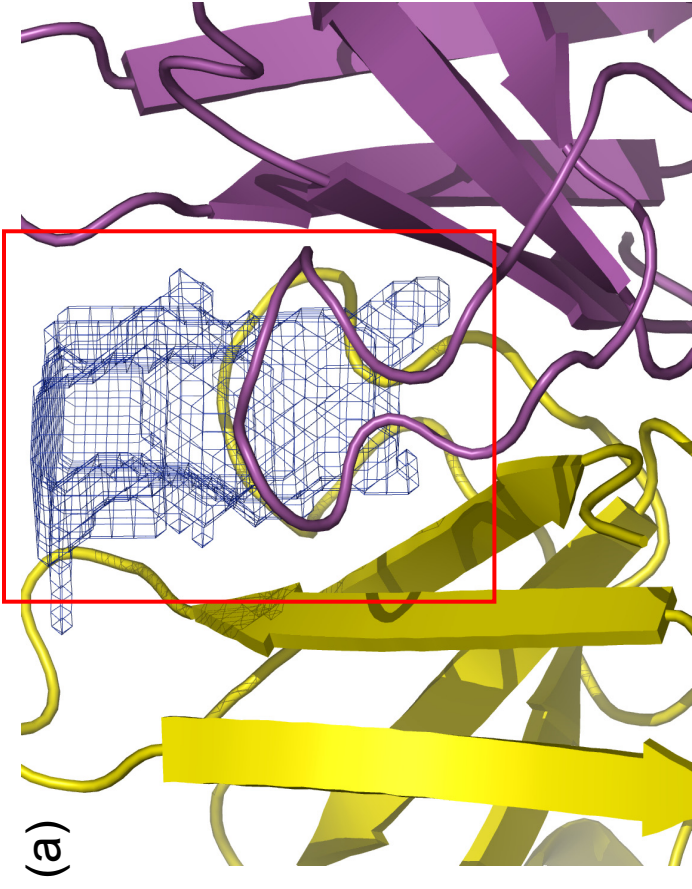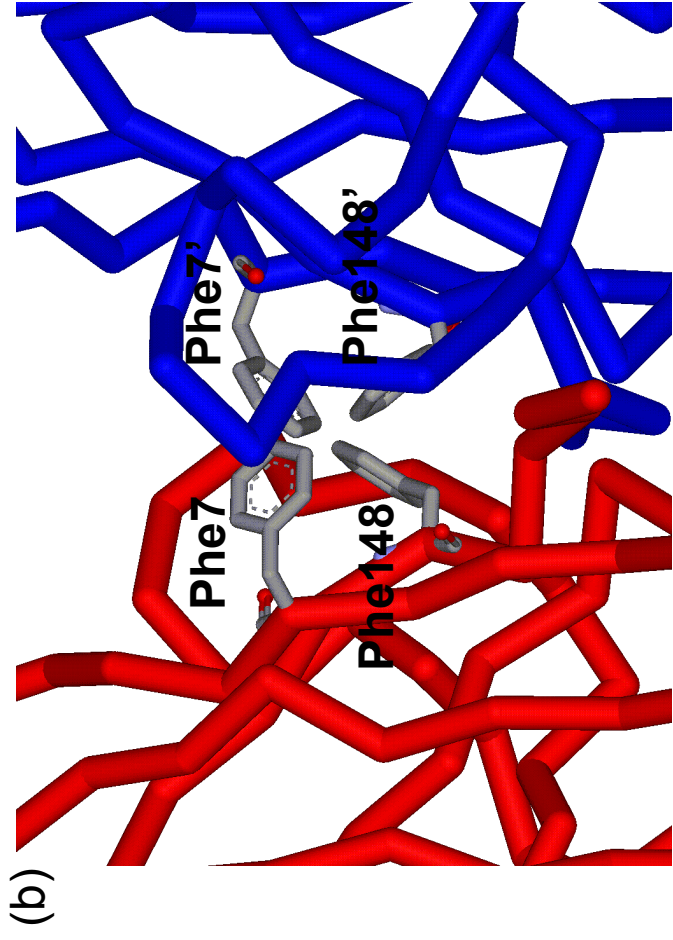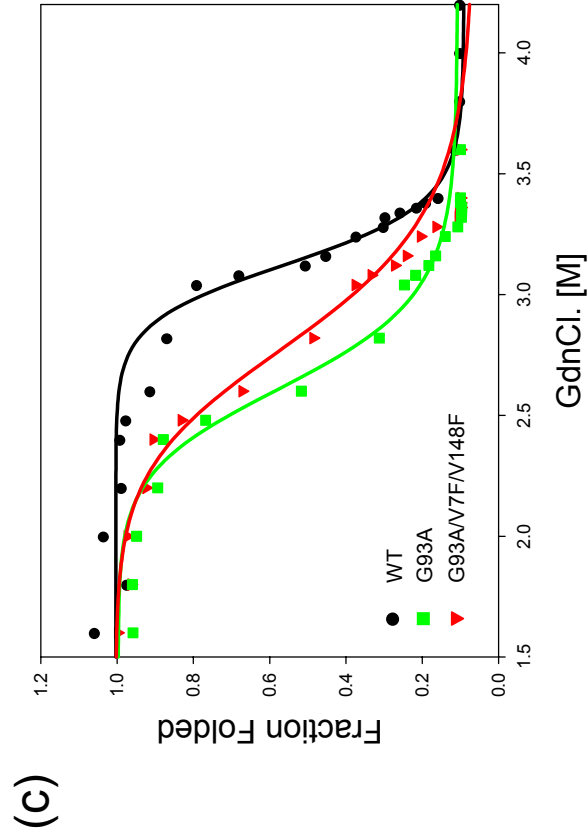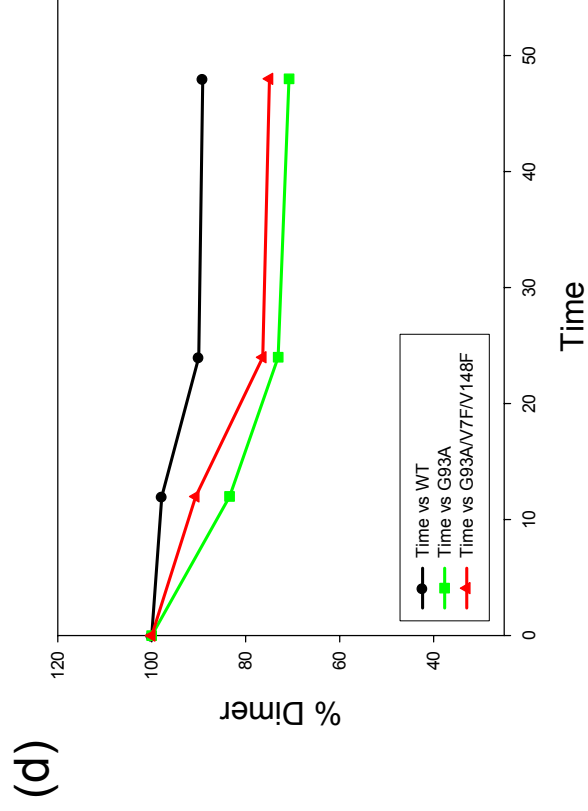

Supplement: pnas_102_10_3639__4.pdf [file pnas_102_10_3639__4.pdf]

(a)

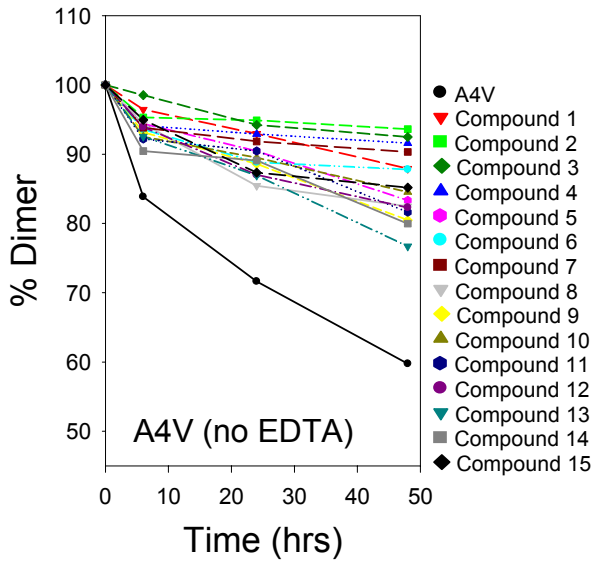

(b)

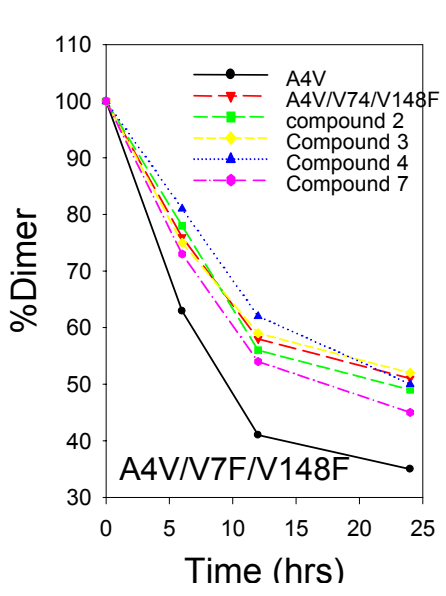

(c)

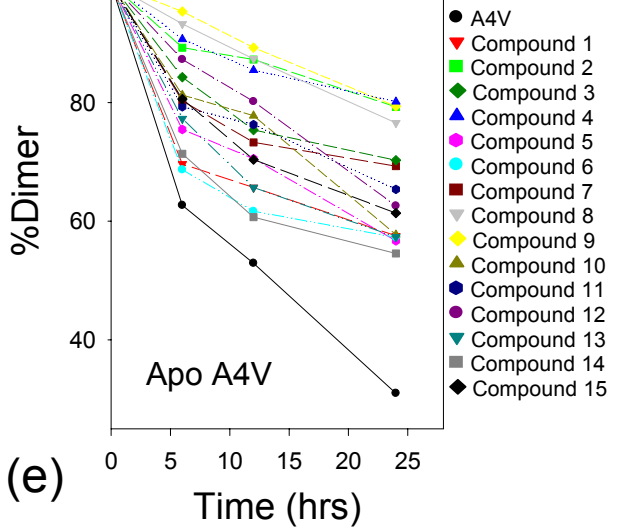

(d)

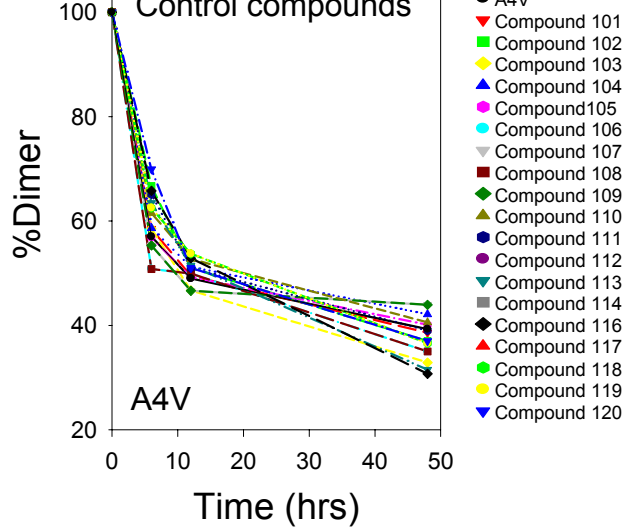

(e)

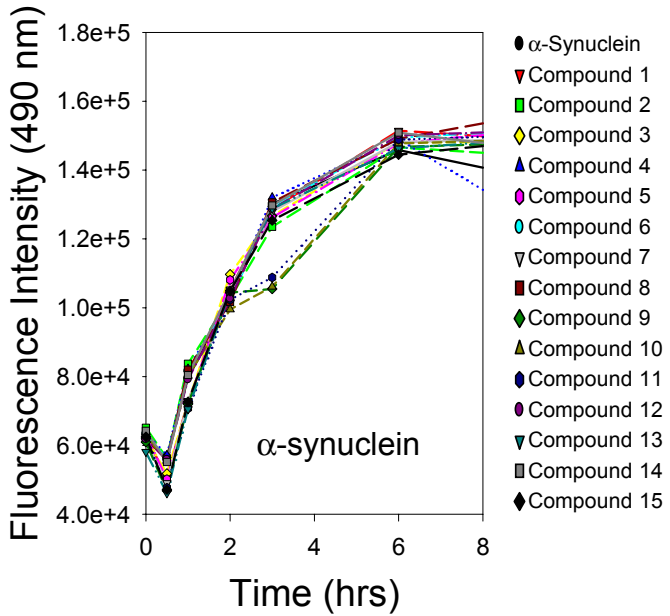

Supplement: pnas_102_10_3639__6.pdf [file pnas_102_10_3639__6.pdf]

(a)

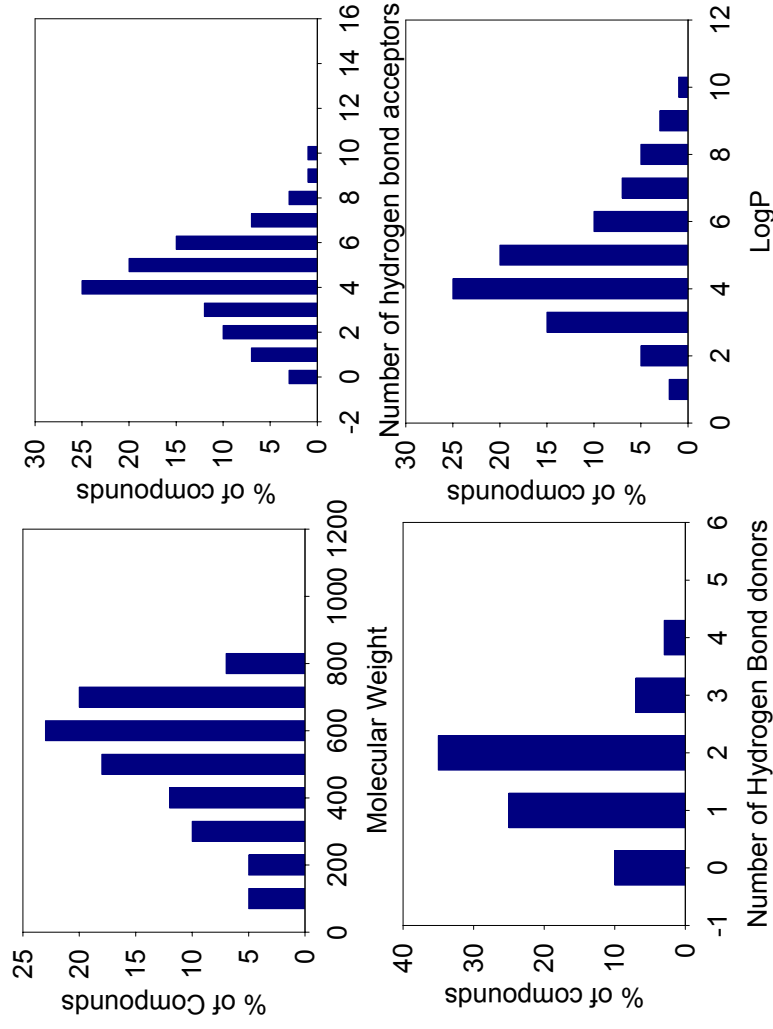

(b)

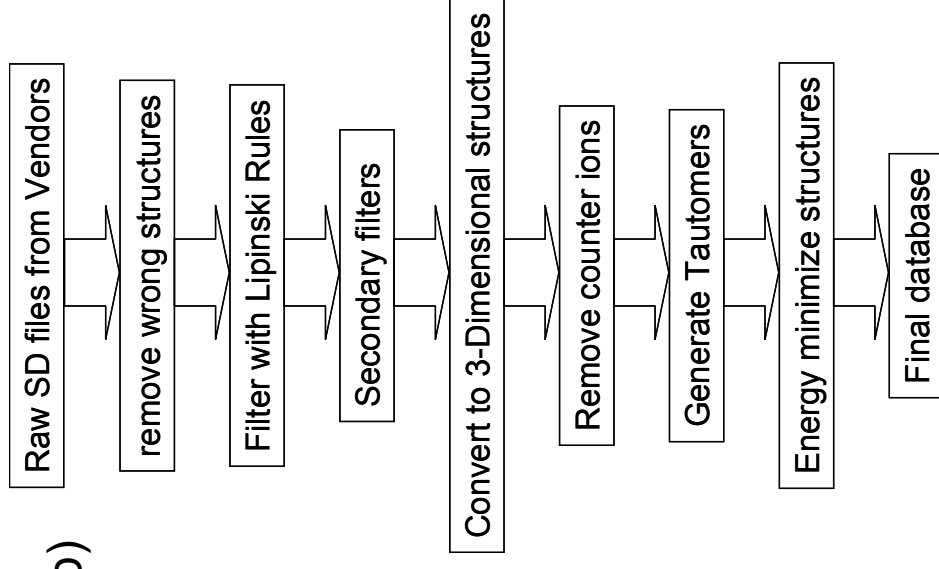

Supplement: pnas_102_10_3639__7.pdf [file pnas_102_10_3639__7.pdf]
